# Supplementary material for: A pathogen-induced putative NAC transcription factor mediates leaf rust resistance in barley
Source: PubMed Central journal article supplement (PMC10482968; doi:10.1038/s41467-023-41021-2), 2023-09-06
Supplement: 41467_2023_41021_MOESM1_ESM.pdf [file 41467_2023_41021_MOESM1_ESM.pdf]

**A pathogen-induced NAC transcription factor mediates leaf rust resistance  
in barley**

Chen *et al.*

**Supplementary Table 1. Recombination-based fine mapping using four F<sub>3</sub> families from the Cebada Capa x WABAR2722 mapping population.**

| Recombinant ID* | Phenotype |                            | Markers |         |     |     |     |      |
|-----------------|-----------|----------------------------|---------|---------|-----|-----|-----|------|
|                 | F2        | F3                         | S1534   | BC00652 | PK3 | PG1 | PG4 | HGA1 |
| 59              | ;1-CN     | Segregating (Seg)          | HR      | HR      | Seg | Seg | Seg | Seg  |
| 92              | ;12CN     | Seg                        | HR      | HR      | Seg | Seg | Seg | Seg  |
| 118             | ;1-CN     | Seg                        | Seg     | Seg     | Seg | Seg | Seg | HR   |
| 145             | :1-CN     | Homozygous Resistance (HR) | HR      | HR      | HR  | HR  | Seg | Seg  |

\* 16 plants per F<sub>3</sub> family have been individually phenotyped and genotyped. The phenotypes and genotypes of the F<sub>3</sub> families were either segregating (seg) or homozygous resistant (HR) for the *Rph7* phenotype and marker genotypes of the *Rph7* carrying parent Cebada Capa parent respectively.

**Supplementary Table 2. Annotation of BAC AY642926 using FGenesh.**

| <b>ID</b>  | <b>Conserved domain class</b>  | <b>Expressed</b> | <b>Gene</b>            | <b>Start*</b> | <b>Stop</b> | <b>Strand</b> |
|------------|--------------------------------|------------------|------------------------|---------------|-------------|---------------|
| FGENESH_1  | PTZ00395                       | yes              | <i>UnkP-1</i>          | 4952          | 5431        | -             |
| FGENESH_2  | unknown                        | no               |                        | 8698          | 10783       | -             |
| FGENESH_3  | unknown                        | no               |                        | 18796         | 20067       | -             |
| FGENESH_4  | ZnF-BED1                       | yes              | <i>ZnF-BED1 (Rph7)</i> | 22759         | 23955       | -             |
| FGENESH_5  | unknown                        | no               |                        | 25402         | 31265       | -             |
| FGENESH_6  | transposon elements            | no               |                        | 34366         | 39278       | -             |
| FGENESH_7  | PTZ00395                       | yes              | <i>UnkP-2</i>          | 52766         | 53245       | +             |
| FGENESH_8  | transposon elements            | no               |                        | 58357         | 66088       | -             |
| FGENESH_9  | ZnF-BED2                       | yes              | <i>ZnF-BED2</i>        | 70348         | 71610       | -             |
| FGENESH_10 | GRDP-like                      | yes              | <i>HvPG1</i>           | 75101         | 79806       | -             |
| FGENESH_11 | transposon elements            | no               |                        | 84330         | 87906       | +             |
| FGENESH_12 | transposon elements            | no               |                        | 92748         | 96728       | +             |
| FGENESH_13 | transposon elements            | no               |                        | 98544         | 105793      | +             |
| FGENESH_14 | DUF4371 superfamily/CLTH/LisH  | yes              | <i>HvPG4</i>           | 107654        | 114129      | -             |
| FGENESH_15 | DUF563                         | yes              | <i>HVHGA2</i>          | 119398        | 122419      | -             |
| FGENESH_16 | SMC_prok_A superfamily         | no               |                        | 125127        | 130378      | +             |
| FGENESH_17 | transposon elements            | no               |                        | 131716        | 135961      | -             |
| FGENESH_18 | unknown                        | no               |                        | 140860        | 141471      | -             |
| FGENESH_19 | DUF563                         | yes              | <i>HvHGA1</i>          | 144762        | 148016      | -             |
| FGENESH_20 | FHY3 superfamily               | no               |                        | 149426        | 153378      | +             |
| FGENESH_21 | Peptidase_C48 superfamily      | no               |                        | 154210        | 162024      | -             |
| FGENESH_22 | Bfil_C_EcoRII_N_B3 superfamily | no               |                        | 165581        | 167380      | -             |
| FGENESH_23 | transposon elements            | no               |                        | 167995        | 176129      | +             |

\*Coordinates based on AY642926.1 of Scherrer *et al.*<sup>29</sup>

**Supplementary Table 3. Details of five Australian pathotypes of *Puccinia hordei* used in the present study.**

| Pathotype | Culture number* | Year of collection | Virulence**                                                    |
|-----------|-----------------|--------------------|----------------------------------------------------------------|
| 200 P+*** | 570             | 1990               | <i>Rph8, Rph19</i>                                             |
| 276 P+    | 675             | 2017               | <i>Rp2, Rph3, Rph4, Rph5, Rph6, Rph8, Rph19</i>                |
| 5457 P+   | 612             | 2009               | <i>Rph1, Rph2, Rph3, Rph4, Rph6, Rph9, Rph10, Rph12, Rph19</i> |
| 5477 P-   | 672             | 2017               | <i>Rph1, Rph2, Rph3, Rph4, Rph5, Rph6, Rph9, Rph10, Rph12</i>  |
| 5553 P+   | 691             | 2020               | <i>Rph1, Rph2, Rph4, Rph6, Rph7, Rph9, Rph10, Rph12, Rph19</i> |

\*Plant Breeding Institute culture number

\*\*Tested for virulence on resistance genes *Rph1, Rph2, Rph3, Rph4, Rph5, Rph6, Rph7, Rph8, Rph9, Rph10, Rph11, Rph12, Rph13, Rph14, Rph15, Rph17, Rph18, Rph19*

\*\*\*Pathogenicity for *Rph6* of isolates avirulent on *Rph2* could not be assigned due to the presence of both *Rph2* and *Rph6* in the differential line Bolivia

**Supplementary Table 4. Complementation experimental data summarising phenotypic and genotypic assessment of Golden Promise + *Rph7* T<sub>1</sub> generation families at the seedling stage.**

| Pathotype       | Plant | B114-1     |          | B114-2    |          | B114-3    |          | B114-17   |          | B114-18   |          |
|-----------------|-------|------------|----------|-----------|----------|-----------|----------|-----------|----------|-----------|----------|
|                 |       | Phenotype* | Genotype | Phenotype | Genotype | Phenotype | Genotype | Phenotype | Genotype | Phenotype | Genotype |
| 5477 P-         | 1     | R          | +        | R         | +        | S         | -        | R         | +        | R         | +        |
|                 | 2     | R          | +        | R         | +        | S         | -        | R         | +        | R         | +        |
|                 | 3     | R          | +        | R         | +        | S         | -        | R         | +        | R         | +        |
|                 | 4     | R          | +        | R         | +        | S         | -        | R         | +        | R         | +        |
|                 | 5     | R          | +        | S         | -        | S         | -        | R         | +        | R         | +        |
|                 | 6     | R          | +        |           |          |           |          | S         | -        | R         | +        |
|                 | 7     | S          | -        |           |          |           |          | S         | -        | R         | +        |
|                 | 8     | S          | -        |           |          |           |          | S         | -        |           |          |
| 276P+           | 9     | R          | +        | R         | +        | S         | -        | R         | +        | R         | +        |
|                 | 10    | R          | +        | R         | +        | S         | -        | R         | +        | R         | +        |
|                 | 11    | R          | +        | R         | +        | S         | -        | R         | +        | R         | +        |
|                 | 12    | R          | +        | R         | +        | S         | -        | R         | +        | R         | +        |
|                 | 13    | R          | +        | R         | +        | S         | -        | R         | +        | R         | +        |
|                 | 14    | R          | +        | R         | +        | S         | -        | R         | +        | R         | +        |
|                 | 15    | S          | -        | S         | -        |           |          | S         | -        | S         | -        |
|                 | 16    |            |          | S         | -        |           |          | S         | -        |           |          |
| 200P+           | 17    | R          | +        | R         | +        | S         | -        | R         | +        | R         | +        |
|                 | 18    | R          | +        | R         | +        | S         | -        | R         | +        | R         | +        |
|                 | 19    | R          | +        | R         | +        | S         | -        | R         | +        | R         | +        |
|                 | 20    | R          | +        | R         | +        | S         | -        | R         | +        | S         | -        |
|                 | 21    | R          | +        | R         | +        | S         | -        | R         | +        | S         | -        |
|                 | 22    | S          | -        | S         | -        | S         | -        | R         | +        |           |          |
|                 | 23    | S          | -        | S         | -        | S         | -        | S         | -        |           |          |
|                 | 24    |            |          |           |          | S         | -        |           |          |           |          |
| 5553P+          | 25    | S          | +        | S         | +        | S         | -        | S         | +        | S         | +        |
|                 | 26    | S          | -        | S         | +        | S         | -        | S         | +        | S         | +        |
|                 | 27    | S          | +        | S         | -        | S         | -        | S         | -        | S         | +        |
|                 | 28    | S          | +        | S         | +        | S         | -        | S         | +        | S         | +        |
|                 | 29    | S          | +        | S         | +        | S         | -        | S         | -        | S         | -        |
|                 | 30    | S          | +        | S         | -        | S         | -        | S         | +        | S         | -        |
|                 | 31    | S          | -        | S         | +        |           |          | S         | -        | S         | +        |
|                 | 32    | S          | +        | S         | +        |           |          | S         | +        | S         | +        |
|                 |       |            | 23/7     |           | 21/7     |           |          |           | 21/10    |           | 22/5     |
| <b>Controls</b> |       |            |          |           |          |           |          |           |          |           |          |
| Golden Promise  | S     | -          |          |           |          |           |          |           |          |           |          |
| Golden Promise  | S     | -          |          |           |          |           |          |           |          |           |          |
| BW758           | R     | +          |          |           |          |           |          |           |          |           |          |
| BW758           | R     | +          |          |           |          |           |          |           |          |           |          |
| Cebada Capa     | R     | +          |          |           |          |           |          |           |          |           |          |
| Cebada Capa     | R     | +          |          |           |          |           |          |           |          |           |          |
| Galaxy          | R     | +          |          |           |          |           |          |           |          |           |          |
| Galaxy          | R     | +          |          |           |          |           |          |           |          |           |          |

\*T<sub>1</sub> sib plants were phenotyped as either resistant (R) or susceptible (S) using a qualitative scale therefore the semi-dominance of the *Rph7* resistance cannot be determined in transgenic families.

**Supplementary Table 5. Top five unique protein structures obtained from the protein databank following a structure-structure search using the *Rph7* AlphaFold2 prediction.**

| <b>PDB ID</b> | <b>Z-score</b> | <b>RMSD</b> | <b>Length aligned</b> | <b>Sequence identity (%)</b> | <b>PDB description</b>                     |
|---------------|----------------|-------------|-----------------------|------------------------------|--------------------------------------------|
| 1ut4          | 9.2            | 2.6         | 83                    | 23                           | DNA-binding NAC domain of Arabidopsis ANAC |
| 3ulx          | 7.9            | 3           | 86                    | 20                           | Rice Stress-responsive NAC1                |
| 3h1z          | 5.1            | 2.8         | 61                    | 3                            | AP-2 COMPLEX SUBUNIT BETA-1                |
| 6e8a          | 5              | 3.1         | 64                    | 8                            | DcrB from <i>Salmonella enterica</i>       |
| 6yai          | 5              | 2.8         | 61                    | 3                            | Clathrin heavy chain                       |

**Supplementary Table 6. Samples processed for RNA-Seq.**

| <b>ID</b> | <b>Timepoint</b> | <b>Treatment</b> | <b>Sample</b> |
|-----------|------------------|------------------|---------------|
| B_1       | day_1            | mock_oil         | BW758*        |
| B_2       | day_1            | mock_oil         | BW758         |
| B_3       | day_1            | mock_oil         | BW758         |
| B_4       | day_1            | mock_oil         | Cebada Capa   |
| B_5       | day_1            | mock_oil         | Cebada Capa   |
| B_6       | day_1            | mock_oil         | Cebada Capa   |
| B_7       | day_1            | mock_oil         | Bowman        |
| B_8       | day_1            | mock_oil         | Bowman        |
| B_9       | day_1            | mock_oil         | Bowman        |
| B_24      | day_1            | infected_5457P+  | BW758         |
| B_25      | day_1            | infected_5457P+  | BW758         |
| B_26      | day_1            | infected_5457P+  | BW758         |
| B_27      | day_1            | infected_5457P+  | Cebada Capa   |
| B_28      | day_1            | infected_5457P+  | Cebada Capa   |
| B_29      | day_1            | infected_5457P+  | Cebada Capa   |
| B_30      | day_1            | infected_5457P+  | Bowman        |
| B_31      | day_1            | infected_5457P+  | Bowman        |
| B_32      | day_1            | infected_5457P+  | Bowman        |
| C_1       | day_6            | mock_oil         | BW758         |
| C_2       | day_6            | mock_oil         | BW758         |
| C_3       | day_6            | mock_oil         | BW758         |
| C_4       | day_6            | mock_oil         | Cebada Capa   |
| C_5       | day_6            | mock_oil         | Cebada Capa   |
| C_6       | day_6            | mock_oil         | Cebada Capa   |
| C_7       | day_6            | mock_oil         | Bowman        |
| C_8       | day_6            | mock_oil         | Bowman        |
| C_9       | day_6            | mock_oil         | Bowman        |
| C_25      | day_6            | infected_5457P+  | BW758         |
| C_26      | day_6            | infected_5457P+  | BW758         |
| C_27      | day_6            | infected_5457P+  | BW758         |
| C_28      | day_6            | infected_5457P+  | Cebada Capa   |
| C_29      | day_6            | infected_5457P+  | Cebada Capa   |
| C_30      | day_6            | infected_5457P+  | Cebada Capa   |
| C_31      | day_6            | infected_5457P+  | Bowman        |
| C_32      | day_6            | infected_5457P+  | Bowman        |
| C_33      | day_6            | infected_5457P+  | Bowman        |

\*BW758 refers to the near isogenic line Bowman+*Rph7*

**Supplementary Table 7. Oligo primer sequences used in the study.**

| Primer name    | Primer sequence (5'→3')                              | Use                    |
|----------------|------------------------------------------------------|------------------------|
| Rph7C1F1       | AAAGCGGCCGCACGATTATCATGAACAAAGAAATATAATAATAACTAATT   | cloning                |
| Rph7C1F2       | AAAGCGGCCGCAGAGAAAGTCATGCGGGGAG                      | cloning                |
| Rph7C1R1       | AAAGCGGCCGCGGCAATTCTTGCTGACAGTGAT                    | cloning                |
| Rph7C1R2       | AAAGCGGCCGCTCCGCCGAAGCCCCTAAATG                      | cloning                |
| s1543 F1       | CGCCTTTTCCTTATCTCCCA                                 | mapping                |
| s1543 R1       | CATGAGAAATTTGATTTGACCGA                              | mapping                |
| BC00651F       | TGCCATTGCCAGCCTAGAAA                                 | mapping                |
| BC00652R       | GAGTTGCTCCCGCGAAATCT                                 | mapping                |
| M1-1434 F1     | TAAACTGCTCCATGGGGAGG                                 | mapping                |
| M1-1434 R1     | CCAATCCGGCATTACTTGCT                                 | mapping                |
| M1-0112 F1     | CTACTCGTCGGAATTCATTTCCTTG                            | mapping                |
| M1-0112 R1     | CCGAGGACCGTTACCGAA                                   | mapping                |
| M1-0886 F1     | ACTGGGAACATTGGAAACTGC                                | mapping                |
| M1-0886 R1     | AACTGATTGGTGTCAAGGATCGT                              | mapping                |
| HvPG4KASPFAM3  | GAAGGTGACCAAGTTCATGCTGTCATGCTCAAAACAGGTAACCCT        | mapping                |
| HvPG4KASPVIC3  | GAAGGTGCGAGTCAACGGATTGTCATGCTCAAAACAGGTAACCCA        | mapping                |
| HvPG4 KASP R3  | GTATCCCTACGCAAGTTATTTGACCTATG                        | mapping                |
| HvPK3KASPFAM5  | GAAGGTGACCAAGTTCATGCTTCTACCACCCGGCTGCCA              | mapping                |
| HvPK3KASPVIC5  | GAAGGTGCGAGTCAACGGATTCTACCACCCGGCTGCC                | mapping                |
| HvPK3KASPR5    | GTCGAGGGGTGTGGACCA                                   | mapping                |
| HvPG1 new F1   | TCCAGGTGTCAGGATCTATTCGT                              | mapping                |
| HvPG1 new R1   | GCCGGTCGATGATATTTGTGTA                               | mapping                |
| HvHGA1 F2      | AGCTTTCTTTCCCGCGTC                                   | mapping                |
| HvHGA1 R2      | TAATCACACTTCGAAGCTGCTG                               | mapping                |
| Rph7_RT_F2     | ACACGATGTTGAAGTTAAAAGGTGG                            | qRT-PCR                |
| Rph7_RT_R1     | ACCATTTTTTTCGGCGACCAA                                | qRT-PCR                |
| Rph7_RT_R2     | AGAGGCACCGTTGAAGAGTTG                                | qRT-PCR,<br>genotyping |
| Rph7_RT_F1     | GAGAAAAACGCTCTTACTCGACC                              | qRT-PCR,<br>genotyping |
| Rph7C1_seqR2   | ACCGTCCACCGCAGTCGT                                   | sequencing             |
| Rph7C1_seqF2   | AGGTCGCACATTCACCCTC                                  | sequencing             |
| Rph7seqR2      | CTCCTTCTCCCAATCCCCATA                                | sequencing             |
| Rph7seqF1      | ACTTACTGGTGGCAGTGGTGG                                | sequencing             |
| Rph7f1         | GAGTAGAGCAGTCCCAGGCC                                 | sequencing             |
| Rph7seqF2      | CTTGCAGCGGGTAGGTGTGG                                 | sequencing             |
| Rph7seqR1      | CCACACCTACCCGCTGCAAG                                 | sequencing             |
| Rph7_attB1     | GGGACAAGTTTGTACAAAAAAGCAGGCTTACTGCATCATCAATCTCCACGGT | cloning                |
| Rph7_attB2     | GGGACCACTTTGTACAAGAAAGCTGGGTCTGAGTAGAGCAGTCCCAGGC    | cloning                |
| Rph7_ATG attB1 | GGGACAAGTTTGTACAAAAAAGCAGGCTTAATGGCAAGCATCGGTGAGATC  | cloning                |
| Rph7_END attB2 | GGGACCACTTTGTACAAGAAAGCTGGGTCCACCAGCTCTAGTTGTTCCGGC  | cloning                |



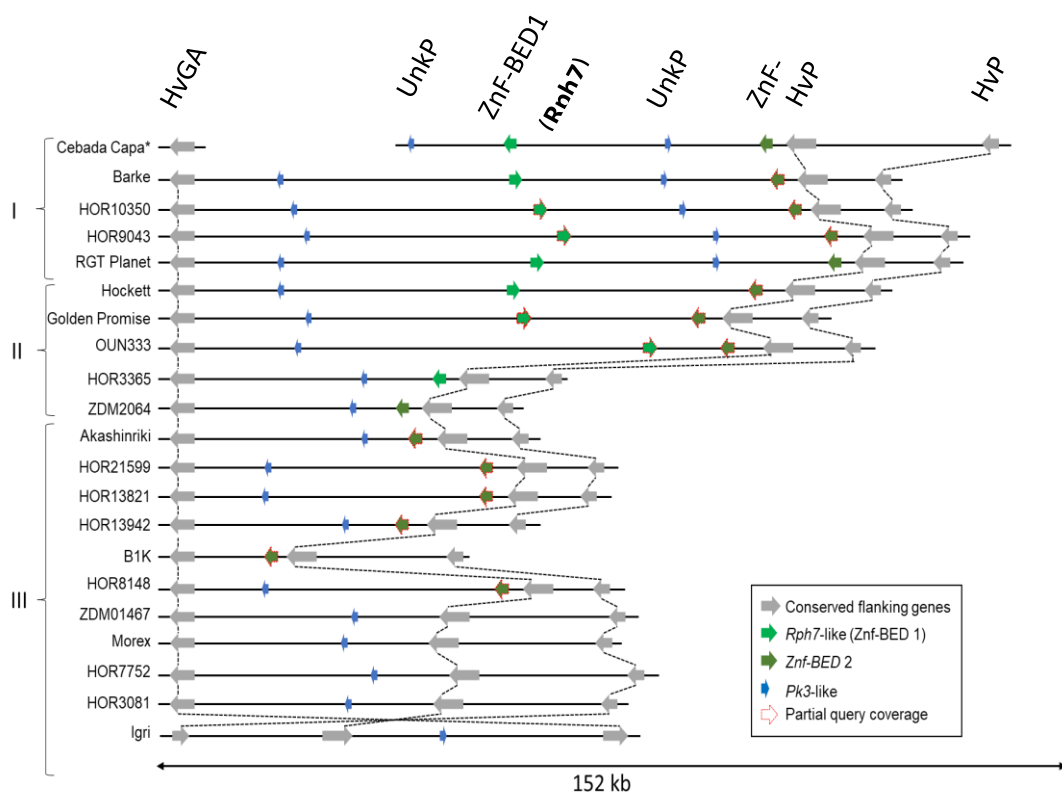

**Supplementary Figure 1. Pan-Genomic representation of expressed genes detected within the genetic interval between *HvGAD1* and *HvPG4* at the *Rph7* locus.** Haplotype I (HI) show the highest level of structural conservation to the *Rph7* resistance haplotype in Cebada Capa evidenced by size and gene content. HII accessions carry a homolog of *Rph7* but are missing either one or more of the other expressed genes within the interval. HIII accessions have no homologous sequence to *Rph7*, or the other Cebada Capa expressed genes, which is evidenced by a reduced interval size indicative of a presence/absence variation. Source data are provided as a Source Data file.

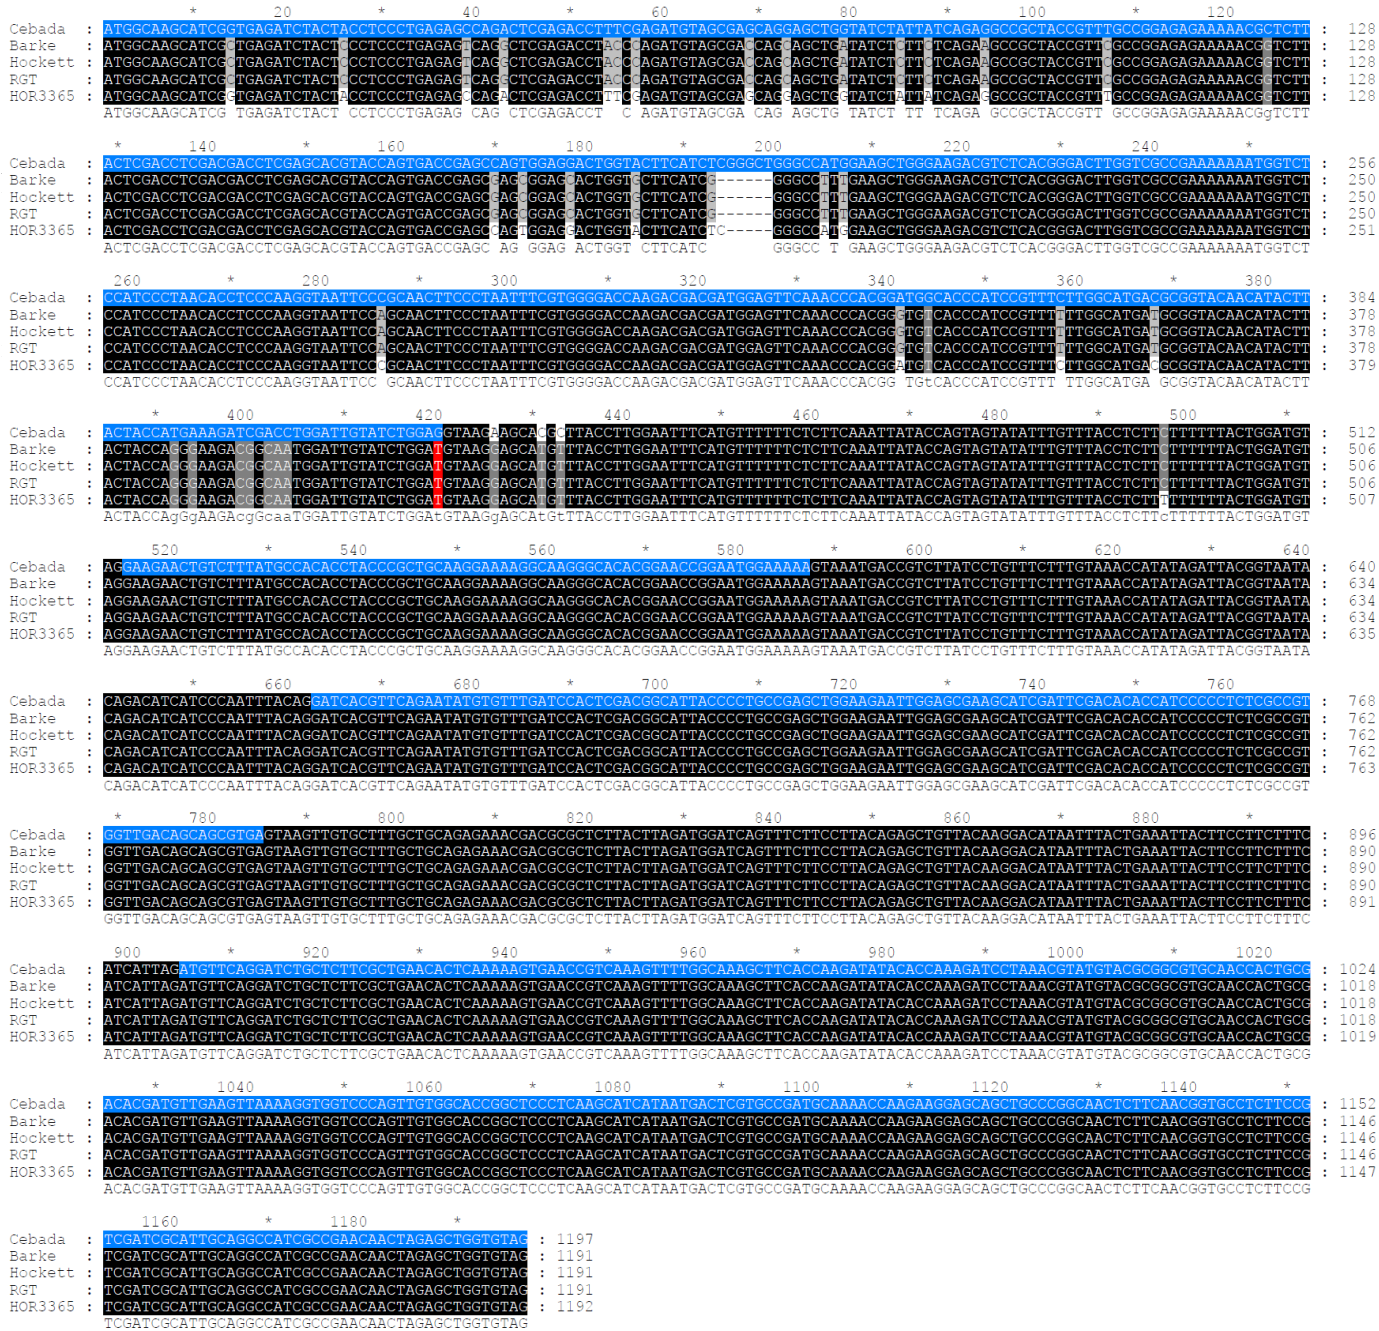

**Supplementary Figure 2. Sequence alignment of genomic sequences of the full-length *Rph7* homologs detected in the barley pan-genome.** The top row represents the full-length genomic sequence of the *Rph7* candidate gene *ZnF-BED1* in resistant donor cultivar Cebada Cpa with exons highlighted in blue. Sequence variations are restricted to the N-terminal part of the gene within the predicted NAC domain. The homolog sequences carry a SNP mutation at the end of Exon 1 (highlighted in red) which likely causes an alternated splicing variant and does not translate to a full-length protein with similarity to *Rph7*. Putative translation stop sites are highlighted by dashed red rectangle. The remaining four partial homologs (in accessions HOR10350, HOR9043, Golden Promise and OUN333) cover the last 793 bp conserved with the displayed sequences and are not shown in this supplementary figure.

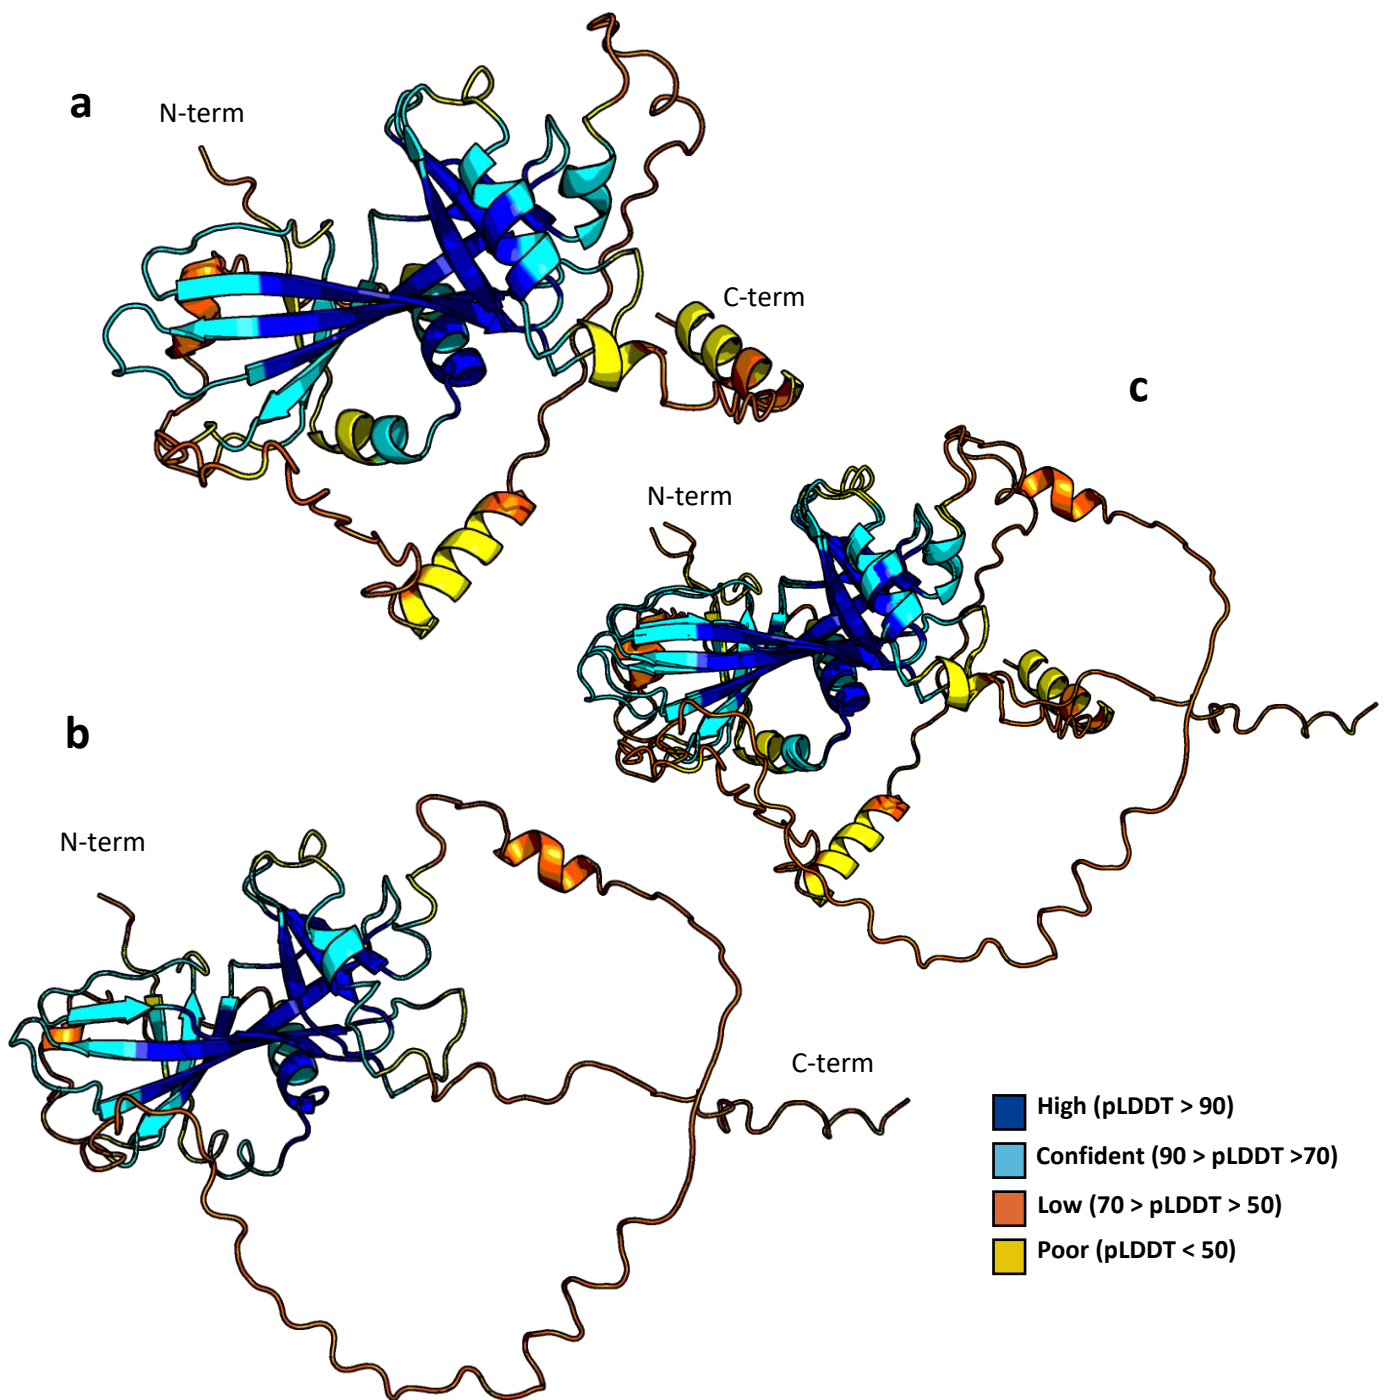

**Supplementary Figure 3. Rph7 structure prediction using AlphaFold2.** **a** The top ranked model produced by AlphaFold2 for Rph7, shown in cartoon representation and coloured according to confidence score (pLDDT), as depicted. where red is the most confident and blue is the least confident. **b** The top ranked model of Rph7 predicted using AlphaFold2 in the absence of templates to reduce model bias. Colouring is represented as in A. **c** Structural superimposition of the two predicted Rph7 structures using the Dali server pairwise alignment function. The predicted structures root mean-squared deviation of 1.2 Å across the entire protein.

**a**

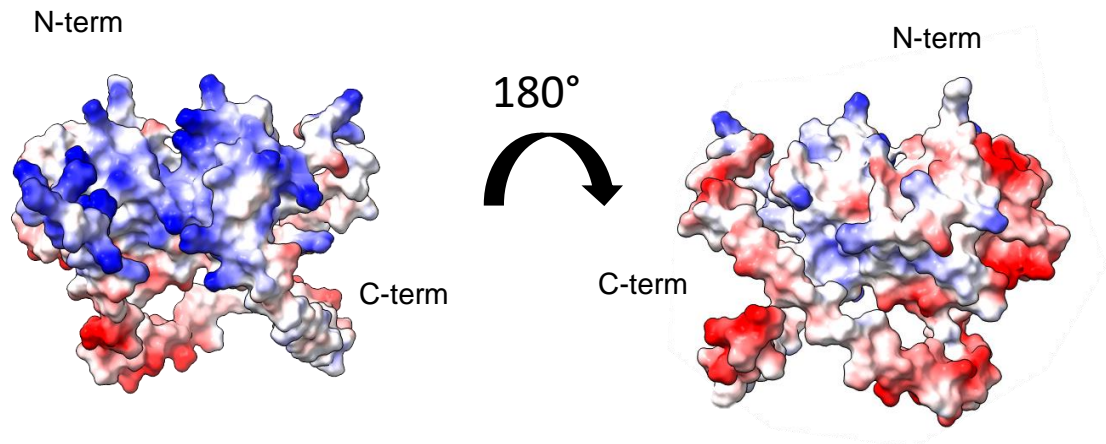

**b**

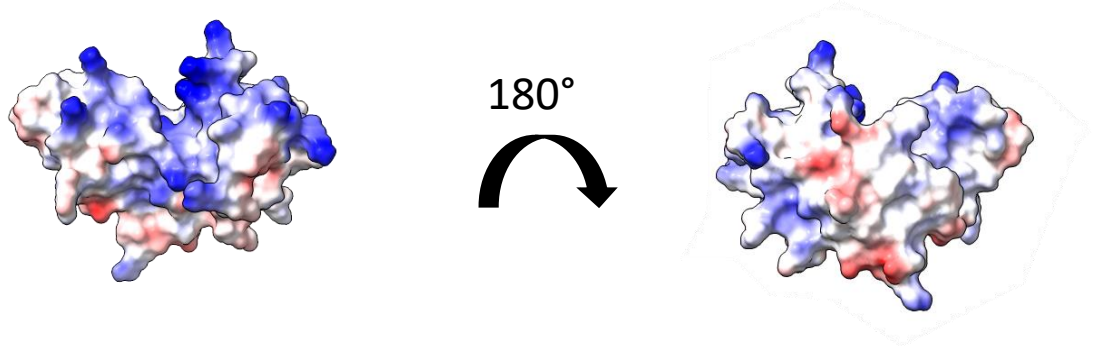

**c**

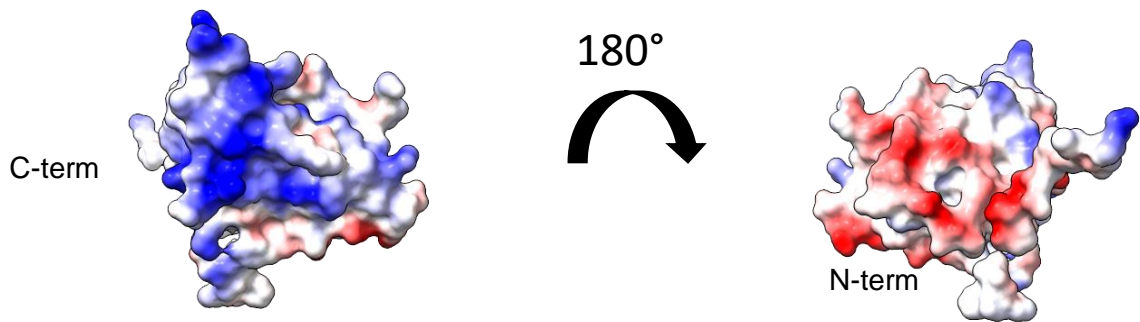

**Supplementary Figure 4. ZnF-BED1 has a large positively charged surface patch suggesting it may bind DNA.** Surface representation of the AlphaFold prediction of **a** ZnF-BED1, **b** ZnF-BED highly confident regions (pLDDT score >70) only, **c** and Arabidopsis ANAC019 (1ut4) showing Coulombic electrostatic potential generated with ChimeraX. The surface is coloured red and blue for negative and positive charges, respectively, and white represents neutral residues.

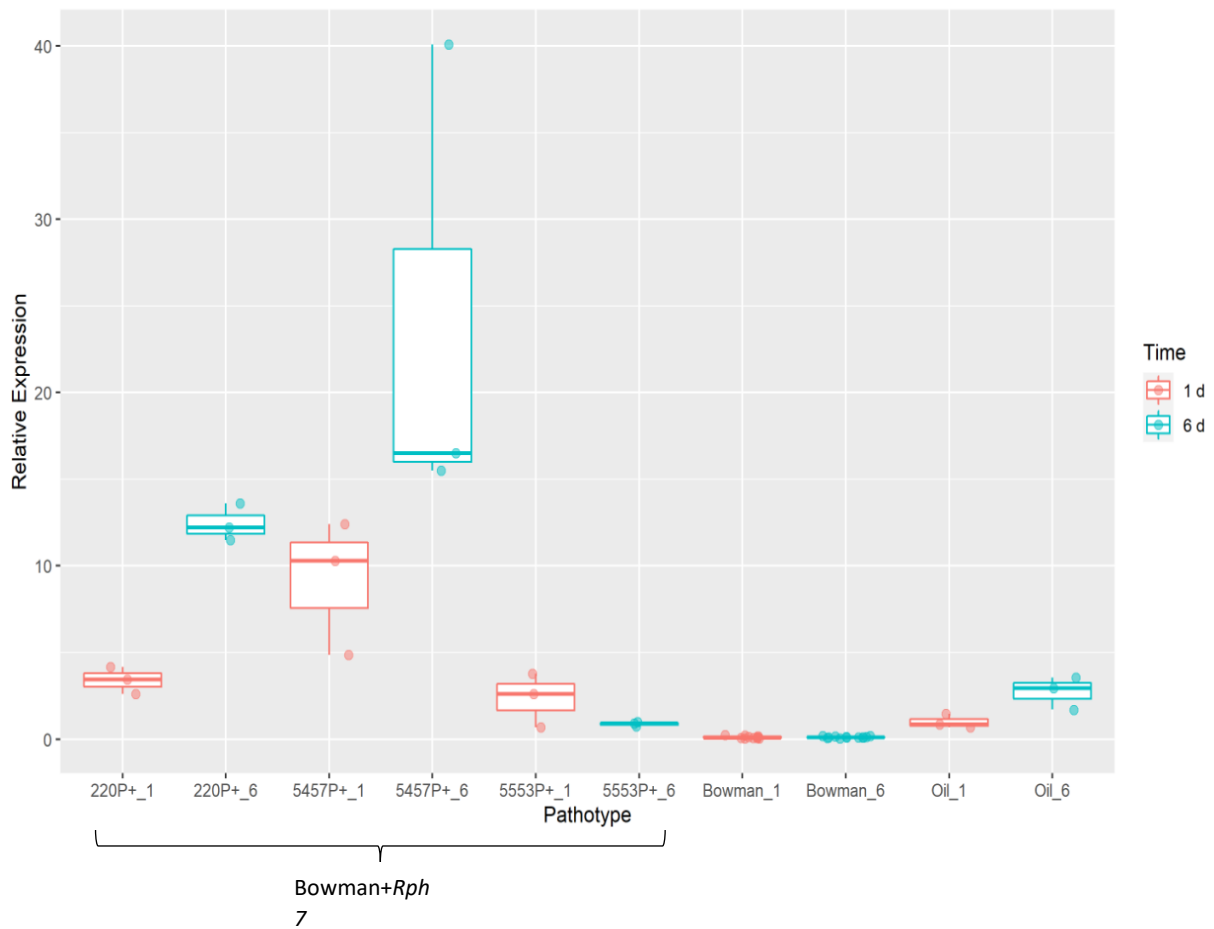

**Supplementary Figure 5. Transcript levels of *Rph7* detected by RT-qPCR on days one and six post inoculation in response to virulent and avirulent *Puccinia hordei* pathotypes.** The *Rph7* gene in Bowman+*Rph7* (BW758) was upregulated 6 days post infection (dpi) compared with the 1 dpi treatment where only moderate up-regulation was observed relative to the leaf rust susceptible control Bowman when infected by *Rph7*-avirulent *P. hordei* pathotypes (220 P+, and 5457 P+), whereas the transcript levels were unchanged when seedlings were infected by *Rph7*- virulent pathotype (5553 P+). The relative expressions of all samples were compared to the expression of BW758 one dpi after oil treatment which was normalised to 1 and the barley actin gene was used as internal normaliser control. The transcript levels of *Rph7* in un-inoculated seedlings (mock inoculation) is depicted by 'oil'. The data presented captures biological replication (n=3) where the box encompasses two middle quartiles, with central line showing mean. Whiskers extend to the furthest data point within 1.5 times the interquartile range. Source data are provided as a Source Data file.

**a**

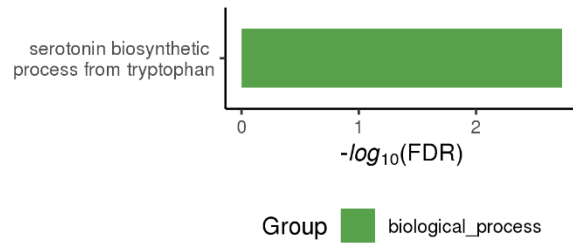

**b**

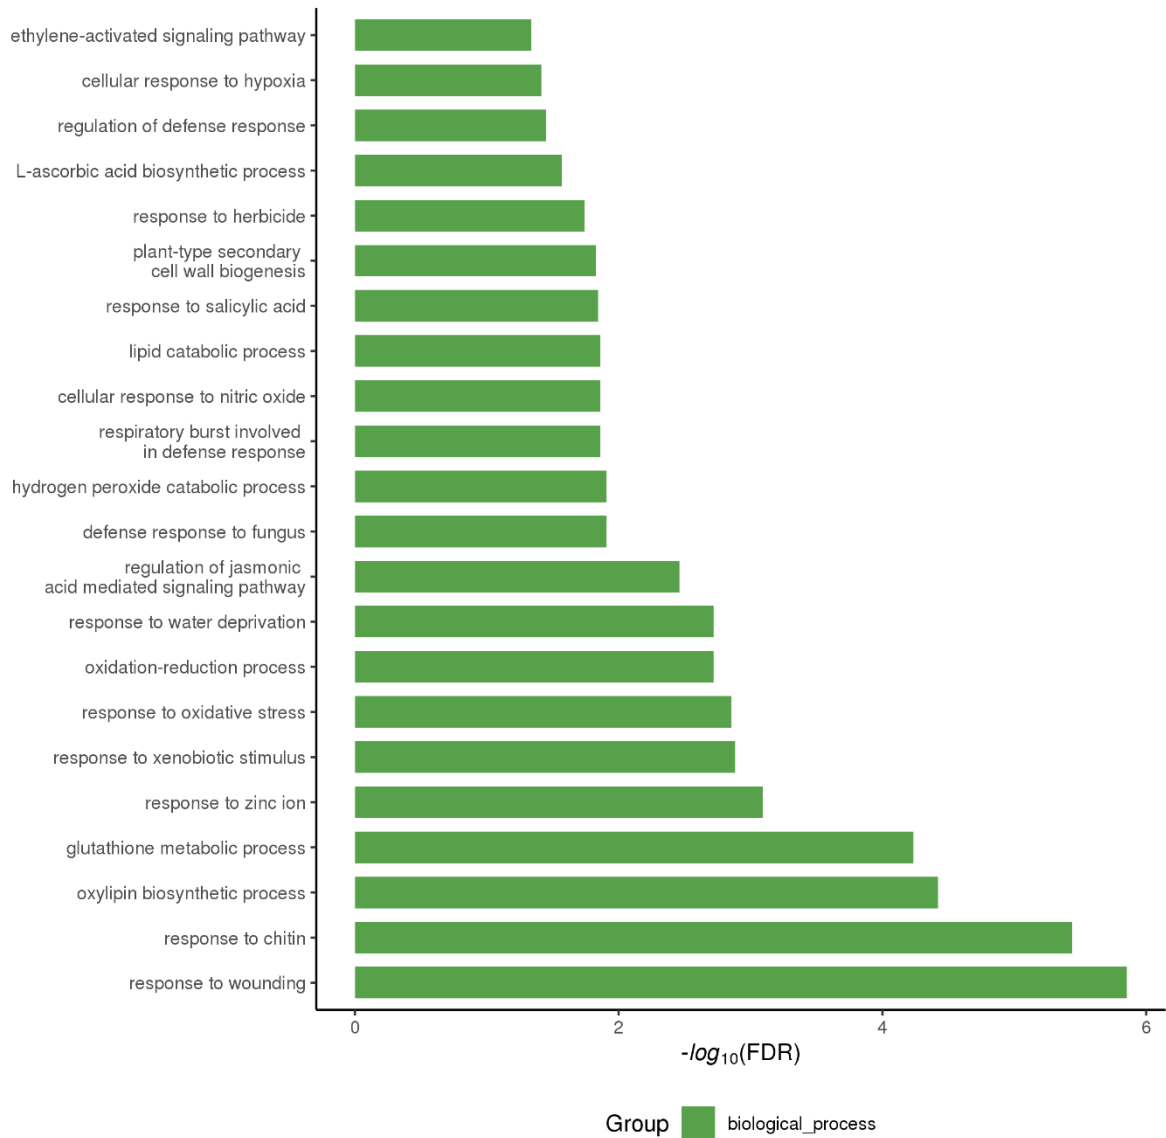

**Supplementary Figure 6. Gene ontology enrichment analysis of detected differential expressed genes (DEG) between Bowman (susceptible) vs BW758 (resistant) at day 1 (a) and day 6 (b) after inoculation with *Rph7*-avirulent *Puccinia hordei* pathotype 5457 P+. Overview of Biological Processes detected in DEGs using Triticeae Gene Tribe (<http://wheat.cau.edu.cn/TGT/>).**

| Gene                      | log2FoldChange | Description                                         |                             |
|---------------------------|----------------|-----------------------------------------------------|-----------------------------|
| HORVU.MOREX.r3.1HG0000480 | 11.5167168     | Jasmonate-induced protein                           | Jasmonate-related           |
| HORVU.MOREX.r3.2HG0205090 | 8.957075061    | Jasmonate-induced protein                           |                             |
| HORVU.MOREX.r3.1HG0000390 | 8.798539053    | Jasmonate-induced protein                           |                             |
| HORVU.MOREX.r3.3HG0330760 | 8.368007039    | Jasmonate-induced protein                           |                             |
| HORVU.MOREX.r3.3HG0330600 | 7.945613979    | Jasmonate-induced protein                           |                             |
| HORVU.MOREX.r3.1HG0000450 | 7.481327173    | Jasmonate induced protein                           |                             |
| HORVU.MOREX.r3.3HG0330720 | 6.079099777    | Jasmonate-induced protein                           |                             |
| HORVU.MOREX.r3.1HG0000470 | 5.3668004      | Jasmonate induced protein                           |                             |
| HORVU.MOREX.r3.3HG0330650 | 5.336017871    | Jasmonate induced protein                           |                             |
| HORVU.MOREX.r3.1HG0000430 | 5.03548161     | Jasmonate-induced protein                           |                             |
| HORVU.MOREX.r3.3HG0330620 | 4.561429708    | Jasmonate-induced protein                           |                             |
| HORVU.MOREX.r3.2HG0163880 | 2.744873093    | Jasmonate zim-domain protein                        |                             |
| HORVU.MOREX.r3.4HG0405230 | 3.641368552    | Jasmonate ZIM domain protein                        |                             |
| HORVU.MOREX.r3.5HG0480600 | 2.450071629    | Jasmonate zim-domain protein                        |                             |
| HORVU.MOREX.r3.7HG0669350 | -2.248440698   | Jasmonate zim-domain protein                        |                             |
| HORVU.MOREX.r3.7HG0669360 | -3.843135333   | Jasmonate zim-domain protein                        |                             |
| HORVU.MOREX.r3.5HG0519340 | 7.849094936    | Pathogenesis-related protein 1                      | Pathogenesis-related        |
| HORVU.MOREX.r3.6HG0619530 | 3.726234428    | Pathogenesis-related protein PR-4                   |                             |
| HORVU.MOREX.r3.7HG0662370 | 2.811237119    | Pathogenesis-related protein 1                      |                             |
| HORVU.MOREX.r3.4HG0383530 | 2.535321426    | Pathogenesis-related protein 1                      |                             |
| HORVU.MOREX.r3.5HG0423030 | 2.687585048    | Thaumatococcus-like protein                         |                             |
| HORVU.MOREX.r3.5HG0423110 | 2.23607062     | Thaumatococcus-like protein                         |                             |
| HORVU.MOREX.r3.5HG0423060 | 2.098756469    | Thaumatococcus-like protein                         |                             |
| HORVU.MOREX.r3.3HG0307860 | 9.475069647    | Salicylate O-methyltransferase                      |                             |
| HORVU.MOREX.r3.3HG0297450 | 5.927803876    | WRKY transcription factor                           |                             |
| HORVU.MOREX.r3.5HG0464240 | 5.622365016    | WRKY transcription factor                           |                             |
| HORVU.MOREX.r3.3HG0237360 | 5.428512893    | WRKY family transcription factor                    |                             |
| HORVU.MOREX.r3.1HG0070910 | 4.086371185    | WRKY transcription factor                           |                             |
| HORVU.MOREX.r3.6HG0618760 | 3.920601689    | WRKY transcription factor, putative                 |                             |
| HORVU.MOREX.r3.7HG0710560 | 2.86203917     | WRKY transcription factor                           |                             |
| HORVU.MOREX.r3.1HG0088760 | 2.84158887     | WRKY transcription factor                           |                             |
| HORVU.MOREX.r3.1HG0092420 | 2.575085338    | WRKY transcription factor                           |                             |
| HORVU.MOREX.r3.1HG0070890 | 2.430739479    | WRKY family transcription factor                    |                             |
| HORVU.MOREX.r3.3HG0286660 | 2.227980799    | WRKY transcription factor                           |                             |
| HORVU.MOREX.r3.3HG0273660 | 2.08655692     | WRKY transcription factor                           |                             |
| HORVU.MOREX.r3.7HG0743280 | -2.521453205   | WRKY transcription factor                           |                             |
| HORVU.MOREX.r3.7HG0743270 | -2.649562839   | WRKY transcription factor                           |                             |
| HORVU.MOREX.r3.1HG0080940 | -2.717058589   | WRKY transcription factor                           |                             |
| HORVU.MOREX.r3.4HG0333220 | -5.75234814    | WRKY transcription factor                           |                             |
| HORVU.MOREX.r3.3HG022490  | 5.583724968    | Disease resistance protein RPM1                     | Disease resistance proteins |
| HORVU.MOREX.r3.2HG0214310 | 5.499532862    | Disease resistance protein RPM1                     |                             |
| HORVU.MOREX.r3.3HG0316460 | 4.21074174     | Disease resistance protein (NBS-LRR class) family   |                             |
| HORVU.MOREX.r3.2HG0106240 | 4.030136776    | disease resistance protein (TIR-NBS-LRR class)      |                             |
| HORVU.MOREX.r3.5HG0514590 | 3.341479475    | NBS-LRR disease resistance protein, putative        |                             |
| HORVU.MOREX.r3.6HG0611400 | 2.872707076    | NB-ARC domain-containing disease resistance protein |                             |
| HORVU.MOREX.r3.6HG0630620 | 2.853213892    | Disease resistance protein RGA2                     |                             |
| HORVU.MOREX.r3.7HG0744510 | 2.29995067     | Disease resistance protein (NBS-LRR class) family   |                             |
| HORVU.MOREX.r3.6HG0559440 | -2.154378054   | Disease resistance protein RPP13                    |                             |
| HORVU.MOREX.r3.7HG0712390 | -2.270475687   | NBS-LRR disease resistance protein                  |                             |
| HORVU.MOREX.r3.7HG0639110 | -2.630017639   | Disease resistance protein (NBS-LRR class) family   |                             |
| HORVU.MOREX.r3.5HG0489840 | -3.103512187   | Disease resistance protein RPP13                    |                             |

**Supplementary Figure 7. Subset of day 6 differential expressed genes (DEGs) indicating *ZnF-BED1 (Rph7)* is likely involved in activating the basal disease response.** DEGs between Bowman and BW785 are colour coded according to log2 Fold Change value for upregulated genes in red and downregulated genes in blue. Gene descriptions have been extracted from Morex\_V3 (Jul 2020) annotation file.
